# Supplementary material for: Alkalinity and nitrate concentrations in calcareous watersheds: Are they linked,and is there an upper limit to alkalinity?
Source: Copernicus journal article supplement (doi:10.5194/bg-2018-461), 2018-11-06
Supplement: Supplementary file 1 [file bg-2018-461-supplement.pdf]

**Supplemental Information File  
for**

**Alkalinity and nitrate concentrations in calcareous watersheds in Switzerland:  
Are they linked, and is there an upper limit to alkalinity?**

Beat Müller<sup>\*1</sup>, Joseph S. Meyer<sup>2,3</sup>, René Gächter<sup>1</sup>

<sup>1</sup> Eawag, Swiss Federal Institute of Aquatic Science and Technology, CH-6047  
Kastanienbaum, Switzerland

<sup>2</sup> Department of Chemistry and Geochemistry, Colorado School of Mines, Golden,  
Colorado 80401 USA

<sup>3</sup> Applied Limnology Professionals LLC, Golden, Colorado 80401 USA

\* Correspondence: [beat.mueller@eawag.ch](mailto:beat.mueller@eawag.ch)

October 10, 2017

Table S1. Nitrification of some common N-fertilizers (Walworth 2013) and several other pertinent chemical reactions in groundwaters and surface waters, in the absence and presence of carbonate minerals; and the associated molar  $\Delta[\text{HCO}_3^-]:\Delta[\text{NO}_3^-]$  and  $\Delta([\text{Ca}]+[\text{Mg}]):\Delta[\text{HCO}_3^-]$  ratios. --- = not listed if either the numerator or denominator is not part of the listed chemical reaction.

| Mineral present | Chemical and transformation                                                                                           | Reactions                                                                                                                                                                                                                                                                                  | Molar<br>$\Delta[\text{HCO}_3^-]:\Delta[\text{NO}_3^-]$<br>ratio | Molar<br>$\Delta([\text{Ca}]+[\text{Mg}]):\Delta[\text{HCO}_3^-]$<br>ratio | Equation<br>number |
|-----------------|-----------------------------------------------------------------------------------------------------------------------|--------------------------------------------------------------------------------------------------------------------------------------------------------------------------------------------------------------------------------------------------------------------------------------------|------------------------------------------------------------------|----------------------------------------------------------------------------|--------------------|
| None            | Anhydrous ammonia ( $\text{NH}_3$ ):<br>Nitrification                                                                 | $\text{NH}_3 + \text{H}_2\text{O} + 2\text{O}_2 = \text{NH}_4^+ + \text{OH}^- + 2\text{O}_2 =$<br>$\text{NO}_3^- + 2\text{H}_2\text{O} + \text{H}^+$                                                                                                                                       | ---                                                              | ---                                                                        | S-1                |
|                 | Ammonium nitrate ( $\text{NH}_4\text{NO}_3$ ):<br>Nitrification                                                       | $\text{NH}_4\text{NO}_3 + 2\text{O}_2 =$<br>$2\text{NO}_3^- + \text{H}_2\text{O} + 2\text{H}^+$                                                                                                                                                                                            | ---                                                              | ---                                                                        | S-2                |
|                 | Diammonium phosphate ( $(\text{NH}_4)_2\text{HPO}_4$ ):<br>Nitrification                                              | $(\text{NH}_4)_2\text{HPO}_4 + 4\text{O}_2 =$<br>$2\text{NO}_3^- + \text{HPO}_4^{2-} + 2\text{H}_2\text{O} + 4\text{H}^+$                                                                                                                                                                  | ---                                                              | ---                                                                        | S-3                |
|                 | Ammonium sulfate ( $(\text{NH}_4)_2\text{SO}_4$ ):<br>Nitrification                                                   | $(\text{NH}_4)_2\text{SO}_4 + 4\text{O}_2 =$<br>$2\text{NO}_3^- + \text{SO}_4^{2-} + 2\text{H}_2\text{O} + 4\text{H}^+$                                                                                                                                                                    | ---                                                              | ---                                                                        | S-4                |
|                 | Urea ( $(\text{NH}_2)_2\text{CO}$ ):<br>Nitrification                                                                 | $(\text{NH}_2)_2\text{CO} + 4\text{O}_2 = 2\text{NO}_3^- + \text{CO}_2 + \text{H}_2\text{O} + 2\text{H}^+ =$<br>$2\text{NO}_3^- + \text{HCO}_3^- + 3\text{H}^+$                                                                                                                            | 0.5                                                              | ---                                                                        | S-5                |
|                 | Nitric acid ( $\text{HNO}_3$ ):<br>Dissociation                                                                       | $\text{HNO}_3 =$<br>$\text{NO}_3^- + \text{H}^+$                                                                                                                                                                                                                                           | ---                                                              | ---                                                                        | S-6                |
|                 | Carbon dioxide / carbonic acid<br>( $\text{CO}_2 / \text{H}_2\text{CO}_3$ ): Dissolution & dissociation               | $\text{CO}_2 + \text{H}_2\text{O} =$<br>$\text{H}_2\text{CO}_3 = \text{HCO}_3^- + \text{H}^+$                                                                                                                                                                                              | ---                                                              | ---                                                                        | S-7                |
|                 | Sugars ( $\{\text{CH}_2\text{O}\}$ <sup>c</sup> ):<br>Respiration                                                     | $\{\text{CH}_2\text{O}\} + \text{O}_2 =$<br>$\text{CO}_2 + \text{H}_2\text{O} = \text{HCO}_3^- + \text{H}^+$                                                                                                                                                                               | ---                                                              | ---                                                                        | S-8                |
|                 | Organic matter ( $\text{C}_{106}\text{H}_{263}\text{O}_{110}\text{N}_{16}\text{P}$ ) <sup>d</sup> :<br>Mineralization | $\text{C}_{106}\text{H}_{263}\text{O}_{110}\text{N}_{16}\text{P} + 138\text{O}_2 =$<br>$16\text{NO}_3^- + \text{HPO}_4^{2-} + 106\text{CO}_2 + 122\text{H}_2\text{O} + 18\text{H}^+ =$<br>$16\text{NO}_3^- + \text{HPO}_4^{2-} + 106\text{HCO}_3^- + 16\text{H}_2\text{O} + 124\text{H}^+$ | 6.625                                                            | ---                                                                        | S-9                |
|                 | Nitrate ( $\text{NO}_3^-$ ):<br>Denitrification                                                                       | $4\text{NO}_3^- + 5\{\text{CH}_2\text{O}\} =$<br>$2\text{N}_2(\text{g}) + 5\text{HCO}_3^- + 2\text{H}_2\text{O} + \text{H}^+$<br>or<br>$2\text{NO}_3^- + 2\{\text{CH}_2\text{O}\} =$<br>$\text{N}_2\text{O}(\text{g}) + 2\text{HCO}_3^- + \text{H}_2\text{O}$                              | -1.25<br>-1.0                                                    | ---                                                                        | S-10<br>S-11       |
|                 | Nitrate ( $\text{NO}_3^-$ ):<br>Dissimilatory nitrate reduction to ammonia                                            | $\text{NO}_3^- + 2\{\text{CH}_2\text{O}\} + \text{H}_2\text{O} =$<br>$\text{NH}_4^+ + 2\text{HCO}_3^-$                                                                                                                                                                                     | -2.0                                                             | ---                                                                        | S-12               |

Table S1 (continued).

| Mineral present                                                            | Chemical and transformation                                                                                                                                                                             | Reactions                                                                                                                                                                                                                                                                                                                                                                                                     | Molar<br>$\Delta[\text{HCO}_3^-]:\Delta[\text{NO}_3^-]$<br>ratio | Molar<br>$\Delta([\text{Ca}]+[\text{Mg}]):\Delta[\text{HCO}_3^-]$<br>ratio | Equation<br>number |
|----------------------------------------------------------------------------|---------------------------------------------------------------------------------------------------------------------------------------------------------------------------------------------------------|---------------------------------------------------------------------------------------------------------------------------------------------------------------------------------------------------------------------------------------------------------------------------------------------------------------------------------------------------------------------------------------------------------------|------------------------------------------------------------------|----------------------------------------------------------------------------|--------------------|
| Carbonates<br>( $\text{Ca}_x\text{Mg}_{(1-x)}\text{CO}_3$ ) <sup>e</sup>   | Anhydrous ammonia ( $\text{NH}_3$ ):<br>Nitrification                                                                                                                                                   | $\text{Ca}_x\text{Mg}_{(1-x)}\text{CO}_3 + \text{NH}_3 + \text{H}_2\text{O} + 2\text{O}_2 =$<br>$\text{Ca}_x\text{Mg}_{(1-x)}\text{CO}_3 + \text{NH}_4^+ + \text{OH}^- + 2\text{O}_2 =$<br>$x\text{Ca}^{2+} + (1-x)\text{Mg}^{2+} + \text{NO}_3^- + \text{HCO}_3^- + 2\text{H}_2\text{O}$                                                                                                                     | 1.0                                                              | 1.0                                                                        | S-13               |
|                                                                            | Ammonium nitrate ( $\text{NH}_4\text{NO}_3$ ):<br>Nitrification                                                                                                                                         | $2\text{Ca}_x\text{Mg}_{(1-x)}\text{CO}_3 + \text{NH}_4\text{NO}_3 + 2\text{O}_2 =$<br>$2x\text{Ca}^{2+} + 2(1-x)\text{Mg}^{2+} + 2\text{NO}_3^- + 2\text{HCO}_3^- + \text{H}_2\text{O}$                                                                                                                                                                                                                      | 1.0                                                              | 1.0                                                                        | S-14               |
|                                                                            | Diammonium phosphate ( $(\text{NH}_4)_2\text{HPO}_4$ ):<br>Nitrification                                                                                                                                | $4\text{Ca}_x\text{Mg}_{(1-x)}\text{CO}_3 + (\text{NH}_4)_2\text{HPO}_4 + 4\text{O}_2 =$<br>$4x\text{Ca}^{2+} + 4(1-x)\text{Mg}^{2+} + 2\text{NO}_3^- + \text{HPO}_4^{2-} + 4\text{HCO}_3^- + 2\text{H}_2\text{O}$                                                                                                                                                                                            | 2.0                                                              | 1.0                                                                        | S-15               |
|                                                                            | Ammonium sulfate ( $(\text{NH}_4)_2\text{SO}_4$ ):<br>Nitrification                                                                                                                                     | $4\text{Ca}_x\text{Mg}_{(1-x)}\text{CO}_3 + (\text{NH}_4)_2\text{SO}_4 + 4\text{O}_2 =$<br>$4x\text{Ca}^{2+} + 4(1-x)\text{Mg}^{2+} + 2\text{NO}_3^- + \text{SO}_4^{2-} + 4\text{HCO}_3^- + 2\text{H}_2\text{O}$                                                                                                                                                                                              | 2.0                                                              | 1.0                                                                        | S-16               |
|                                                                            | Urea ( $(\text{NH}_2)_2\text{CO}$ ):<br>Nitrification                                                                                                                                                   | $3\text{Ca}_x\text{Mg}_{(1-x)}\text{CO}_3 + (\text{NH}_2)_2\text{CO} + 4\text{O}_2 =$<br>$3x\text{Ca}^{2+} + 3(1-x)\text{Mg}^{2+} + 2\text{NO}_3^- + 4\text{HCO}_3^-$                                                                                                                                                                                                                                         | 2.0                                                              | 0.75                                                                       | S-17               |
|                                                                            | Nitric acid ( $\text{HNO}_3$ ):<br>Dissociation                                                                                                                                                         | $\text{Ca}_x\text{Mg}_{(1-x)}\text{CO}_3 + \text{HNO}_3 =$<br>$x\text{Ca}^{2+} + (1-x)\text{Mg}^{2+} + \text{NO}_3^- + \text{HCO}_3^-$                                                                                                                                                                                                                                                                        | 1.0                                                              | 1.0                                                                        | S-18               |
|                                                                            | Carbon dioxide / carbonic acid<br>( $\text{CO}_2 / \text{H}_2\text{CO}_3$ ): Dissolution & dissociation                                                                                                 | $\text{Ca}_x\text{Mg}_{(1-x)}\text{CO}_3 + \text{CO}_2 + \text{H}_2\text{O} =$<br>$x\text{Ca}^{2+} + (1-x)\text{Mg}^{2+} + 2\text{HCO}_3^-$                                                                                                                                                                                                                                                                   | ---                                                              | 0.5                                                                        | S-19               |
|                                                                            | Sugars ( $\{\text{CH}_2\text{O}\}$ ) <sup>c</sup> :<br>Respiration                                                                                                                                      | $\text{Ca}_x\text{Mg}_{(1-x)}\text{CO}_3 + \{\text{CH}_2\text{O}\} + \text{O}_2 =$<br>$x\text{Ca}^{2+} + (1-x)\text{Mg}^{2+} + 2\text{HCO}_3^-$                                                                                                                                                                                                                                                               | ---                                                              | 0.5                                                                        | S-20               |
|                                                                            | Organic matter ( $\text{C}_{106}\text{H}_{263}\text{O}_{110}\text{N}_{16}\text{P}$ ) <sup>d</sup> :<br>Mineralization                                                                                   | $124\text{Ca}_x\text{Mg}_{(1-x)}\text{CO}_3 + \text{C}_{106}\text{H}_{263}\text{O}_{110}\text{N}_{16}\text{P} + 138\text{O}_2 =$<br>$124x\text{Ca}^{2+} + 124(1-x)\text{Mg}^{2+} + 16\text{NO}_3^- + \text{HPO}_4^{2-} + 230\text{HCO}_3^- + 16\text{H}_2\text{O}$                                                                                                                                            | 14.375                                                           | 0.539                                                                      | S-21               |
|                                                                            | Nitrate ( $\text{NO}_3^-$ ):<br>Denitrification                                                                                                                                                         | $\text{Ca}_x\text{Mg}_{(1-x)}\text{CO}_3 + 4\text{NO}_3^- + 5\{\text{CH}_2\text{O}\} =$<br>$x\text{Ca}^{2+} + (1-x)\text{Mg}^{2+} + 2\text{N}_2(\text{g}) + 6\text{HCO}_3^- + 2\text{H}_2\text{O}$<br>or<br>$\text{Ca}_x\text{Mg}_{(1-x)}\text{CO}_3 + 2\text{NO}_3^- + 2\{\text{CH}_2\text{O}\} =$<br>$x\text{Ca}^{2+} + (1-x)\text{Mg}^{2+} + \text{N}_2\text{O}(\text{g}) + 3\text{HCO}_3^- + \text{OH}^-$ | -1.5                                                             | 0.167                                                                      | S-22               |
| Nitrate ( $\text{NO}_3^-$ ):<br>Dissimilatory nitrate reduction to ammonia | $\text{Ca}_x\text{Mg}_{(1-x)}\text{CO}_3 + \text{NO}_3^- + 2\{\text{CH}_2\text{O}\} + 2\text{H}_2\text{O} =$<br>$x\text{Ca}^{2+} + (1-x)\text{Mg}^{2+} + \text{NH}_4^+ + 3\text{HCO}_3^- + \text{OH}^-$ | -3.0                                                                                                                                                                                                                                                                                                                                                                                                          | 0.333                                                            | S-24                                                                       |                    |

<sup>a</sup>  $\{\text{CH}_2\text{O}\}$  = generic chemical formula for sugars (e.g., glucose,  $\text{C}_6\text{H}_{12}\text{O}_6$ ).<sup>d</sup> Based on Redfield ratio; equivalent to  $(\text{CH}_2\text{O})_{106}(\text{NH}_3)_{16}(\text{H}_3\text{PO}_4)$  (Stumm and Morgan 1996: page 887).<sup>e</sup> Generic formula for a mixture of calcium- and magnesium-containing carbonates.

Table S2. Regressions of alkalinity *versus* nitrate (NO<sub>3</sub><sup>-</sup>) for the Swiss groundwaters, Canton Zürich well waters, Swiss lakes, and Swiss rivers in Figure 1 in the accompanying text. 95% confidence intervals of slopes and intercepts are in parentheses; “p” is the probability value of the slope or intercept being equal to 0 (i.e., p < 0.05 indicates significant difference from zero); Alk = alkalinity; NS = not significant.

| Waters                    | NO <sub>3</sub> <sup>-</sup> range for regression (mmol/L) | Slope                                               |        | Intercept             |        | Regression R <sup>2</sup> | n  |
|---------------------------|------------------------------------------------------------|-----------------------------------------------------|--------|-----------------------|--------|---------------------------|----|
|                           |                                                            | Value (meq Alk/ mmol NO <sub>3</sub> <sup>-</sup> ) | p      | Value (meq/L)         | p      |                           |    |
| Swiss groundwaters        | <0.25                                                      | 14.23<br>(10.66 - 17.81)                            | <0.001 | 2.44<br>(1.94 - 2.94) | <0.001 | 0.785                     | 21 |
|                           | >0.25                                                      | 2.78<br>(0.24 - 5.32)                               | 0.034  | 4.75<br>(3.67 - 5.83) | <0.001 | 0.216                     | 21 |
| Canton Zürich well waters | <0.25                                                      | 17.46<br>(12.78 - 22.14)                            | <0.001 | 2.57<br>(1.80 - 3.34) | <0.001 | 0.628                     | 36 |
|                           | >0.25                                                      | 1.51<br>(0.39 - 2.64)                               | 0.009  | 5.86<br>(5.36 - 6.35) | <0.001 | 0.080                     | 84 |
| Swiss lakes               | <0.25                                                      | 17.00<br>(12.05 - 21.95)                            | <0.001 | 1.69<br>(1.29 - 2.08) | <0.001 | 0.731                     | 21 |
| Swiss rivers              | <0.25                                                      | 11.82<br>(10.38 - 13.25)                            | <0.001 | 1.57<br>(1.41 - 1.72) | <0.001 | 0.937                     | 22 |
